# Supplementary material for: Geographical variation in sperm morphology in the red-winged blackbird (Agelaius phoeniceus)
Source: Springer Nature journal article supplement (doi:10.1007/s10682-010-9410-5), 2010-07-22
Supplement: MOESM2 [file 10682_2010_9410_MOESM2_ESM.doc]

| **Supplementary Table S2:** Location means of the male and female phenotypic measurements (in mm) and sperm morphometry (±SE; in µm) used for our analyses, together with the corresponding sample sizes (*N*). The references indicate the data sources for measurements of male phenotype, for female measurements see footnotes b–c. | | | | | | | | | | | | | | | | | |
| --- | --- | --- | --- | --- | --- | --- | --- | --- | --- | --- | --- | --- | --- | --- | --- | --- | --- |
|  | **Male phenotype** | | | |  | **Female phenotype** | | | |  | **Sperm morphometrics** | | | | |  |  |
| **Loc.**a | **Tarsus** | **Wing** | **Tail** | ***N*** |  | **Tarsus** | **Wing** | **Tail** | ***N*** |  | **Head** | **Midpiece** | **Flagellum** | **Total length** | ***N*** |  | **References** |
| 1 | 29.3 | 122.9 | 91.4 | 3 |  | 26.2 | 101.8 | 76.4 | 7 | b | 15.0 ± 0.23 | 111.3 ± 1.15 | 125.0 ± 1.24 | 140.0 ± 1.31 | 4 |  | Field Museum |
| 2 | 29.5 | 125.9 | 91.7 | 29 |  | 26.5 | 103.8 | 74.9 | 4 | c | 15.5 ± 0.20 | 111.5 ± 0.40 | 125.2 ± 0.67 | 140.7 ± 0.79 | 4 |  | Van Rossem (1926) |
| 3 | 30.8 | 125.0 | 92.0 | 21 |  | 26.2 | 103.7 | 74.3 | 5 | c | 14.8 ± 0.19 | 112.0 ± 0.76 | 125.5 ± 0.53 | 140.3 ± 0.47 | 8 |  | L. Merrill for this study |
| 4 | – | – | – | – |  | – | – | – | – |  | 15.4 ± 0.10 | 110.0 ± 0.97 | 126.7 ± 0.56 | 142.1 ± 0.61 | 14 |  | d |
| 5 | 30.9 | 124.3 | 94.8 | 4 |  | 26.3 | 102.3 | 74.5 | 6 | b | 15.4 ± 0.11 | 114.8 ± 0.25 | 129.7 ± 0.45 | 145.1 ± 0.51 | 33 |  | This study |
| 6 | 30.0 | 124.3 | 91.7 | 20 |  | 26.3 | 102.3 | 74.5 | 6 | b | 15.4 ± 0.11 | 114.9 ± 0.68 | 127.9 ± 0.54 | 143.3 ± 0.54 | 20 |  | J. Rivers for this study |
| 7 | 31.1 | 126.7 | 95.1 | 22 |  | 27.2 | 104.2 | 77.4 | 19 | c | 15.2 ± 0.12 | 111.9 ± 0.91 | 126.1 ± 0.64 | 141.3 ± 0.64 | 17 |  | Van Rossem (1926) |
| 8 | 29.0 | 129.2 | 97.6 | 11 |  | 25.8 | 106.1 | 79.4 | 15 | c | 15.2 ± 0.05 | 112.6 ± 0.40 | 125.0 ± 0.48 | 140.2 ± 0.50 | 20 |  | Power (1970) |
| 9 | 29.3 | 120.7 | 90.2 | 26 |  | 26.7 | 99.9 | 75.5 | 44 | c | 15.7 ± 0.12 | 115.9 ± 0.34 | 130.3 ± 0.44 | 146.0 ± 0.43 | 33 |  | This study |
| 10 | 31.0 | 124.0 | 93.7 | 3 |  | 25.8 | 106.1 | 79.4 | 15 | c | 14.6 ± 0.06 | 112.2 ± 0.72 | 127.6 ± 1.58 | 142.2 ± 1.63 | 3 |  | J. Rivers for this study |
| 11 | 28.7 | 118.9 | 86.8 | 4 |  | 25.6 | 93.0 | 68.5 | 9 | b | 14.1 ± 0.09 | 114.7 ± 0.65 | 129.8 ± 0.32 | 143.9 ± 0.33 | 20 |  | Field Museum |
| 12 | 29.0 | 120.5 | 91.3 | 1 |  | 25.8 | 98.9 | 72.7 | 40 | b | 15.1 ± 0.11 | 115.2 ± 0.50 | 129.6 ± 0.52 | 144.6 ± 0.54 | 19 |  | Field Museum |
| 13 | 30.1 | 122.8 | 93.6 | 25 |  | 26.8 | 99.3 | 74.5 | 10 | c | 15.4 ± 0.16 | 114.8 ± 0.56 | 129.9 ± 0.54 | 145.2 ± 0.61 | 21 |  | This study |
| 14 | 30.1 | 125.5 | 95.0 | 151 |  | 25.8 | 98.9 | 72.7 | 40 | b | 14.6 ± 0.08 | 111.7 ± 0.58 | 128.4 ± 0.51 | 143.0 ± 0.54 | 24 |  | This study |
| 15 | 30.2 | 120.7 | 92.2 | 53 |  | 26.2 | 102.4 | 73.7 | 164 | c | 15.4 ± 0.05 | 114.9 ± 0.25 | 129.7 ± 0.21 | 145.1 ± 0.22 | 188 |  | This study |
| 16 | 28.7 | 113.1 | 87.4 | 35 |  | 25.2 | 92.8 | 70.9 | 20 | b | 15.7 ± 0.09 | 115.9 ± 0.44 | 130.3 ± 0.56 | 146.0 ± 0.53 | 16 |  | Howell & Van Rossem (1928) |
| 17 | 30.2 | 123.4 | 91.3 | 159 |  | 26.3 | 101.4 | 72.7 | 125 | c | 14.5 ± 0.13 | 114.5 ± 0.37 | 130.2 ± 0.26 | 144.6 ± 0.32 | 15 |  | This study |
| aLocation numbers as in Table 1 and Fig. 1: 1 Whidbey Island, WA; 2 Los Banos, CA; 3 Goleta Sanitary District, CA; 4 Alpaugh, CA; 5 Columbia NWR, WA; 6 Malheur NWR, OR; 7 Kern River Preserve, CA; 8 Fort Collins, CO; 9 Bismarck, ND; 10 Quivira NWR, KS; 11 Eagle Lake, TX; 12 Portageville, MO; 13 Beloit, WI; 14 Drakesboro, KY; 15 Hickory Corners, MI; 16 Fort Myers, FL; 17 Ithaca, NY.  bPopulations, in which female morphology was not measured. Measurements are thus mean values from Jaramillo & Burke (1999) for the corresponding subspecies.  cPopulations with female measurements provided by the same source as male measurements (see References).  dFor technical reasons, no phenotypic measurements could be taken in this location. We used the data from location 3 for our analyses, which is supposed to be the same subspecies, although molecular evidence is currently missing (for further details see Material and Methods). | | | | | | | | | | | | | | | | | |

**References**

Howell AH, van Rossem AJ (1928) A study of the red-winged blackbirds of souteasthern United States. Auk 45:155-163

Power DM (1970) Geographic variation of red-winged blackbirds in Central North America. Univ Kansas Publ Mus Nat Hist 19:1-83

Van Rossem AJ (1926) The California forms of *Agelaius phoeniceus* (Linnaeus). Condor 28:215-230
